# Supplementary material
Source: PubMed Central journal article supplement (PMC4764200)
Supplement: supp_ddw007_ddw007supp.pdf [file supp_ddw007_ddw007supp.pdf]

1  
2  
3  
4  
5  
6  
7  
8  
9  
10  
11  
12

**Supplementary Online Material**

**COMPREHENSIVE ANALYSIS OF SCHIZOPHRENIA-ASSOCIATED LOCI HIGHLIGHTS  
BIOLOGICALLY RELEVANT NEURONAL PATHWAYS**

Tune H Pers, Pascal Timshel, Stephan Ripke, Samantha Lent, Schizophrenia Working Group of  
the Psychiatric Genomics Consortium, Patrick F. Sullivan, Michael C. O’Donovan, Lude Franke  
and Joel N Hirschhorn

13

## 14 **SUPPLEMENTARY NOTE**

15

### 16 **Negative control analyses**

17 To ensure that our findings were not driven by biases in DEPICT towards genes with high  
18 postnatal expression, we first used DEPICT to prioritize genes for 29 GWAS catalog traits.  
19 From the GWAS Catalog [www.genome.gov/gwastudies/](http://www.genome.gov/gwastudies/) (download date: 02 January 2014) we  
20 downloaded 61 phenotypes with at least 10 fully independent (DEPICT locus definition) loci (as  
21 previously described in ref. <sup>1</sup>. For each phenotype, DEPICT was run using the same parameters as  
22 used for the schizophrenia analysis. Phenotypes with at least 10 significantly prioritized (false  
23 discovery rate < 0.05) were plotted. Only two traits exhibited a larger t test statistic for prenatal  
24 versus/ postnatal expression, namely ulcerative colitis and psoriasis. We found that only two traits  
25 comprised prioritized genes with more extreme postnatal- versus prenatal expression levels  
26 (Supplementary Figure 5).

27

28 To show that genes prioritized by DEPICT by design do not enrich for genes with high postnatal  
29 expression, we ran DEPICT gene prioritization 1,000 times using null associations with no  
30 genetic basis and counted the number of null runs that resulted in more significant prenatal versus  
31 postnatal expression t-statistics than the one observed for the real data. Towards this end, we  
32 performed 1,000 DEPICT analyses based on GWAS with no genetic relationship between SNPs  
33 and the phenotypes (referred to as null GWAS in this paper). Briefly, a GWAS was constructed  
34 based on genotype data from the Diabetes Genetics Initiative <sup>2</sup> using random phenotypes drawn  
35 from a standard normal distribution for all samples. This process was repeated 1,000 times.  
36 DEPICT was then run for each null GWAS using on average the top associated, independent (LD  
37  $r^2 > 0.5$ ) 133.2 SNPs (standard deviation 17.8) as input and otherwise the same parameters as used  
38 for the schizophrenia SNPs. For each DEPICT run we stored the top 62 prioritized genes  
39 (regardless of the false discovery rates, which, as expected, were mostly insignificant) and used  
40 them to assess whether DEPICT gene prioritization is biased towards genes with high postnatal  
41 expression, that is whether the 62 top genes from the null runs exhibited similar temporal  
42 expression as the 62 prioritized schizophrenia genes schizophrenia. Based on the 1000 null  
43 GWAS and DEPICT runs, expression levels of genes within null loci and the 62 prioritized genes  
44 were summarized the following way:

- 45 1. For each null run and stage we calculated the median across all structures. In this way we  
46 processed each permutation as we did for schizophrenia prioritized/associated genes and  
47 all other gene lists.
- 48 2. To plot the average across all permutations (shown as a thick line in Supplementary  
49 Figure 6) we calculated the mean of all 1000 permutations. The shaded area corresponds  
50 to the standard deviation over all 1000 permutations.

51 We found that in only 61 instances, top-ranked genes showed more extreme postnatal- versus  
52 prenatal expression levels (empirical  $P=0.061$ ; Supplementary Figure 7).

53

54

55

56

57

58

59

60

## 61 SUPPLEMENTARY FIGURES

62

63 **Supplementary Figure 1 – Significantly enriched reconstituted gene sets.** We report 104  
64 significantly enriched reconstituted gene sets (FDR<0.05, Supplementary Table 3). Please note  
65 that DEPICT identified 143 significantly enriched reconstituted gene sets, but that 39 were  
66 omitted due to a potential mismatch between the reconstituted gene set identifier and the  
67 reconstituted gene set (see Methods and Supplementary Table 9). Reconstituted gene sets are  
68 represented by nodes and their overlap is represented by edges. Reconstituted gene sets are  
69 colour-coded based on their degree of enrichment in genes from genome-wide significant  
70 schizophrenia loci (the darker the more significant). Pairwise overlap between reconstituted gene  
71 sets were estimated by computing the Pearson correlation coefficient  $\rho$  between two reconstituted  
72 gene sets followed by discretization into one of three bins;  $0.3 \leq \rho < 0.5$  denotes low overlap,  
73  $0.5 \leq \rho < 0.7$  denotes medium overlap, and  $\rho \geq 0.7$  denotes high overlap. Edges representing overlap  
74 corresponding to  $\rho < 0.3$  are not shown. **a**, 18 reconstituted cellular compartment terms from the  
75 Gene Ontology database<sup>3</sup> were enriched. **b**, 20 reconstituted protein complexes derived from the  
76 InWeb database<sup>4</sup> were enriched. **c**, 48 reconstituted canonical pathways from the KEGG and  
77 REACTOME databases<sup>5,6</sup> and biological process and molecular function terms from the Gene  
78 Ontology database were enriched. **d**, 18 reconstituted gene sets representing mouse phenotypes  
79 from the Mouse Genetics Initiative database<sup>7</sup> were enriched.

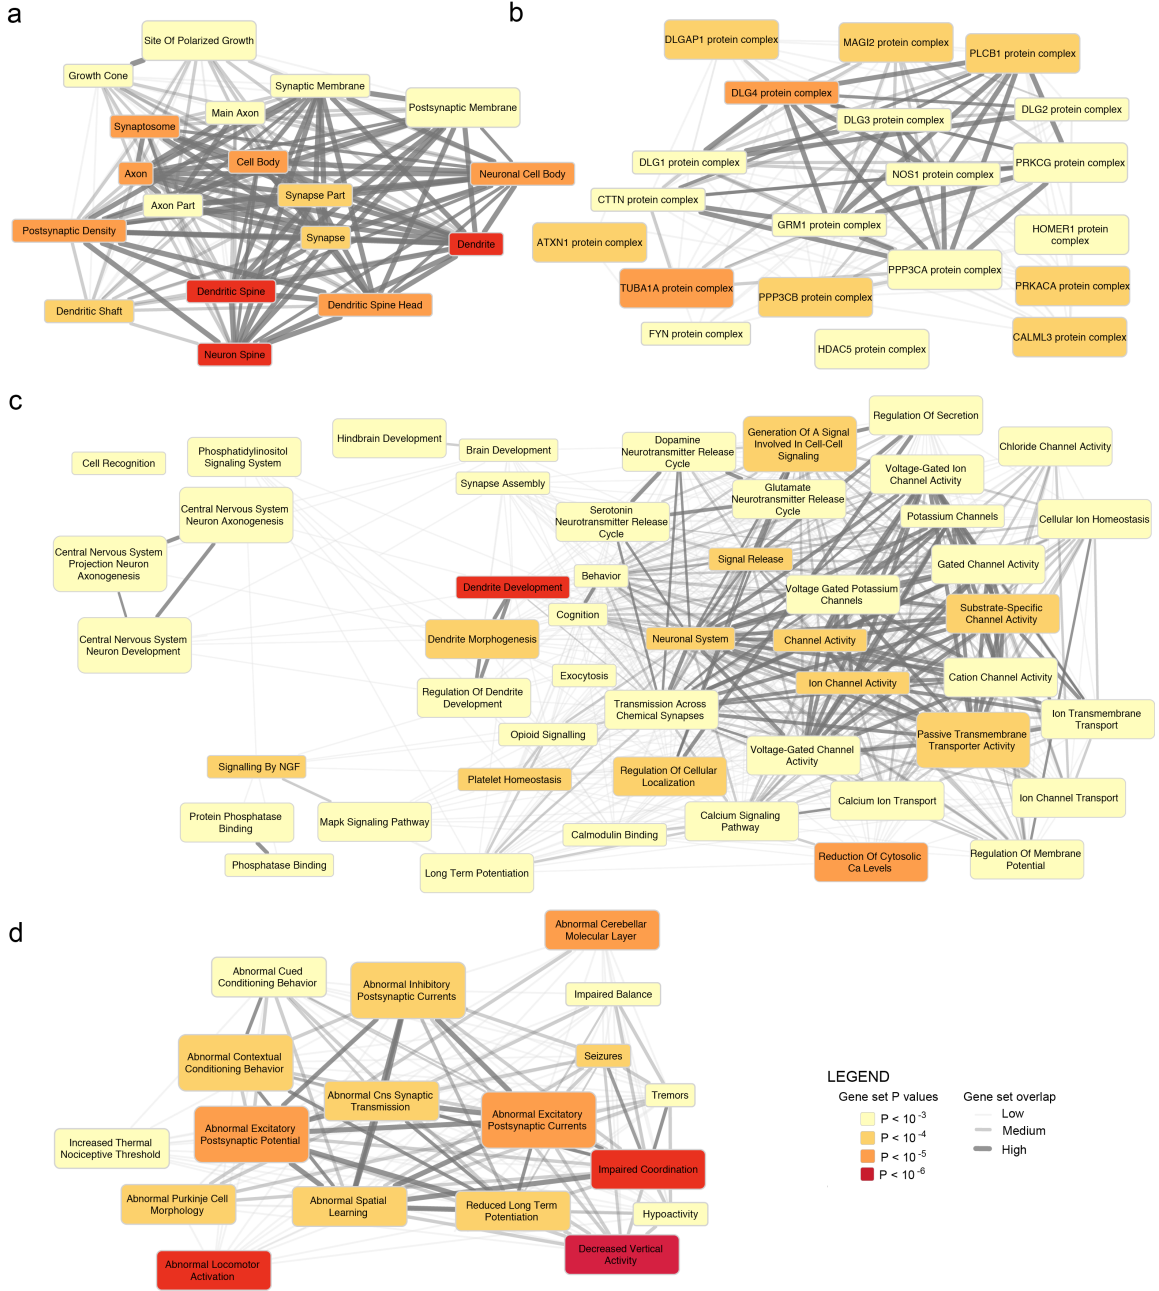

81

82 **Supplementary Figure 2 – BrainSpan Developing Brain expression trajectories of**  
83 **prioritized genes.** The 62 prioritized genes' expression trajectories from early prenatal to  
84 adulthood for four prefrontal cortex tissues (dorsolateral prefrontal cortex, DFC; anterior  
85 cingulate cortex, MFC; orbital frontal cortex, OFC; ventrolateral frontal cortex, VFC). The  
86 average expression of prioritized genes (gray line) and structure-specific expression (colored  
87 lines) were Loess smoothed.

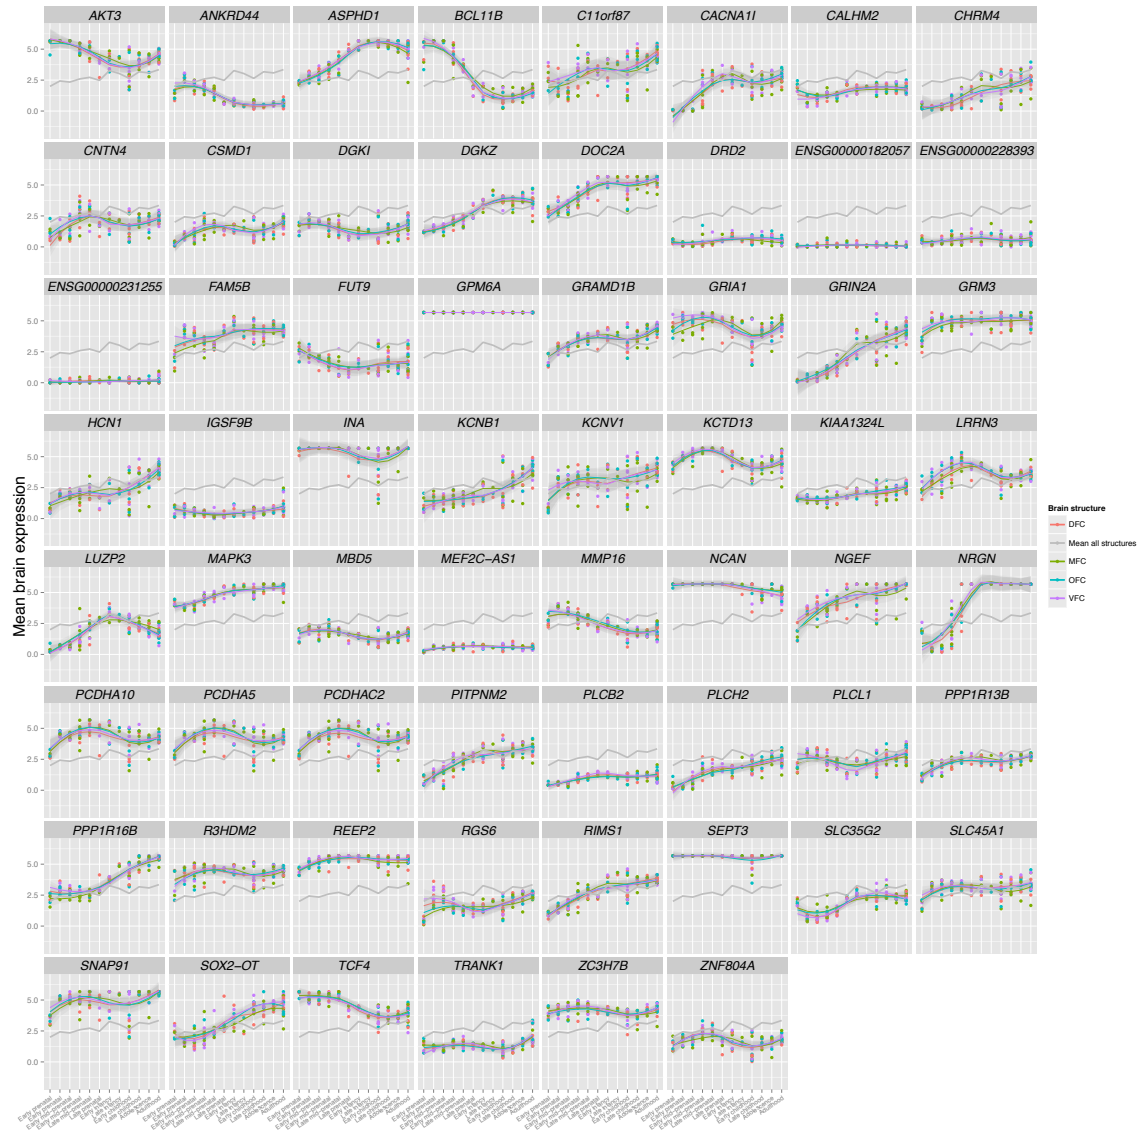

88

89

90

91

92 **Supplementary Figure 3 – Microarray-based trajectories with gene lists**

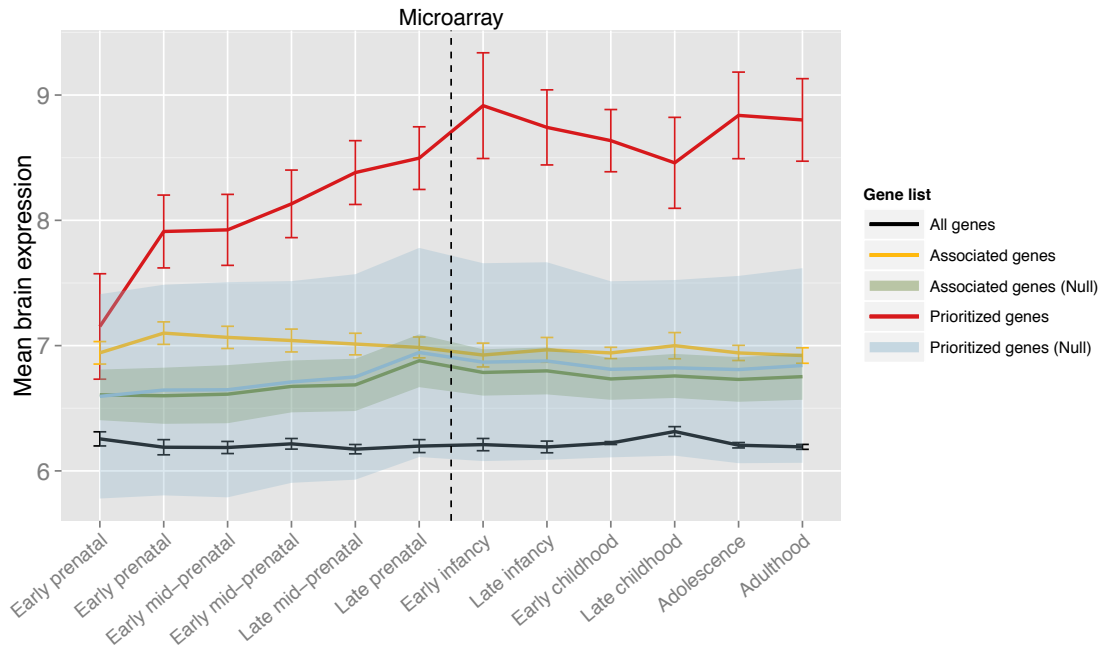

93

94

95

96 **Supplementary Figure 4 – Overlap of gene lists**

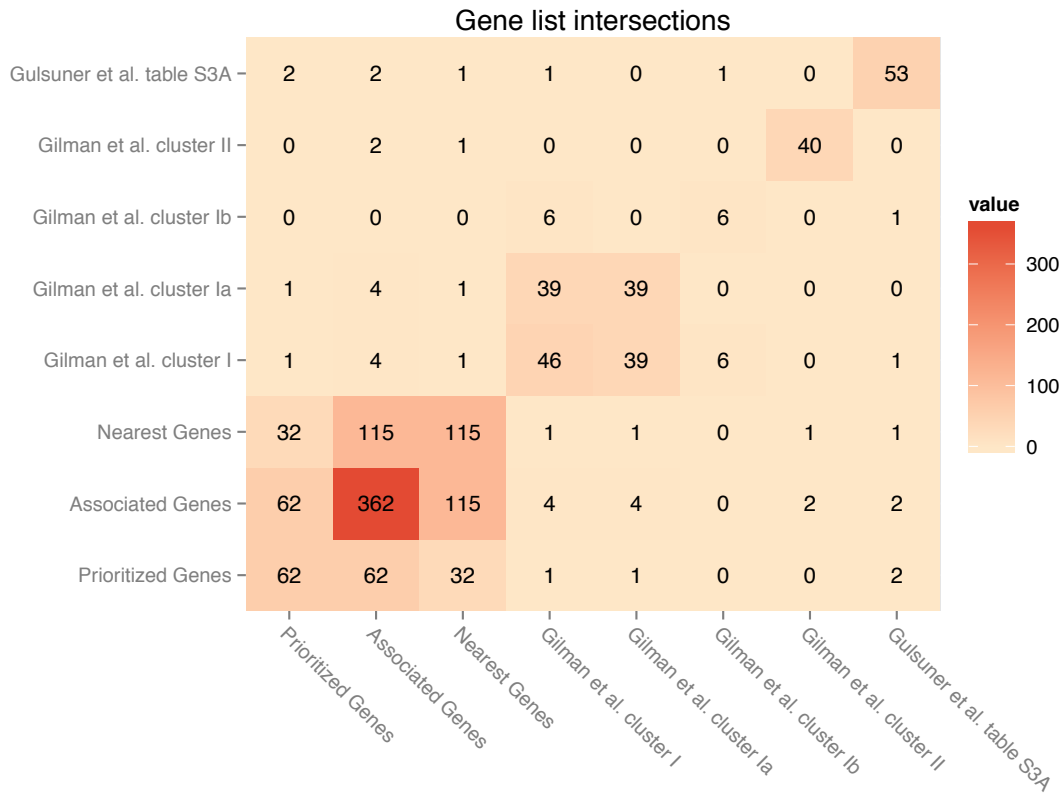

97

98



99 **Supplementary Figure 5 – GWAS catalog traits’ trajectories**

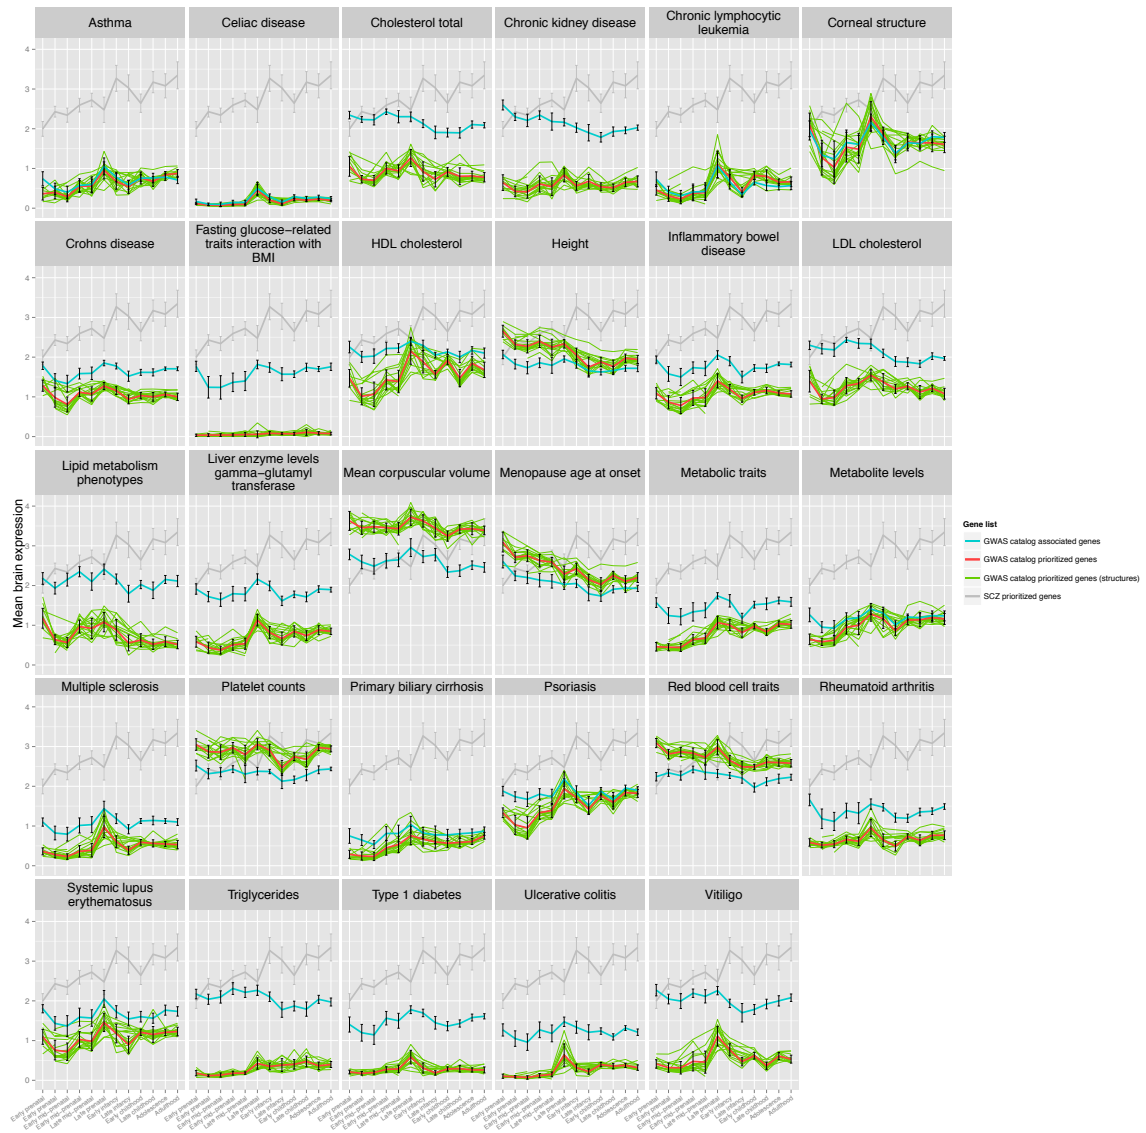

100  
101

102  
103

Supplementary Figure 6 – RNA-Seq-based trajectories with null results

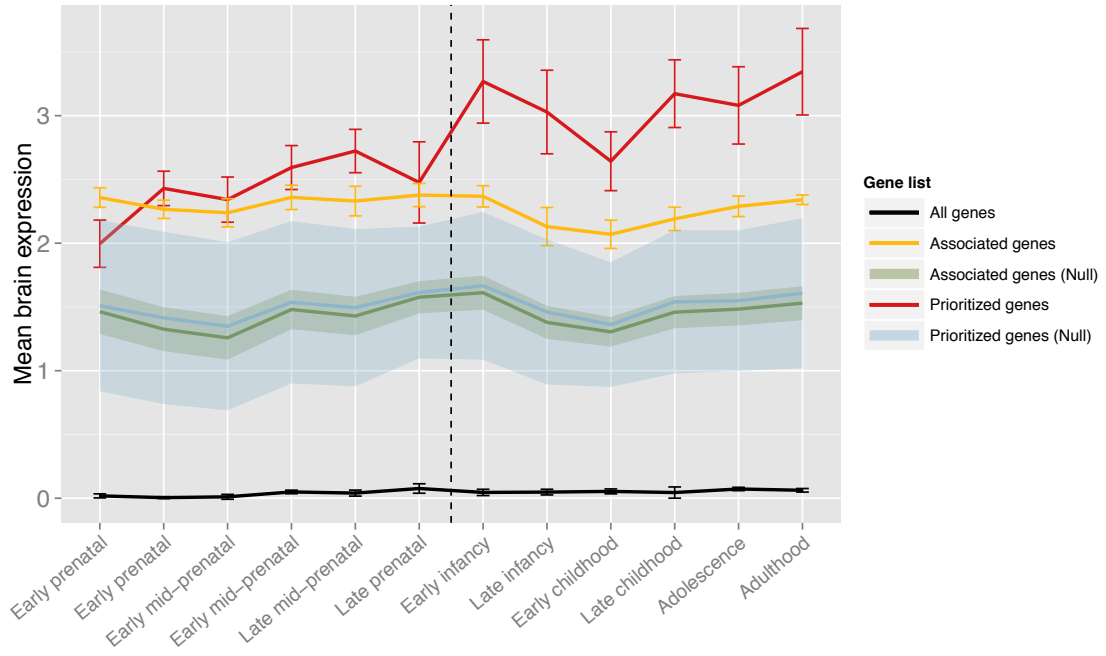

104  
105  
106

107  
108

Supplementary Figure 7 – RNA-Seq-based trajectories with null results

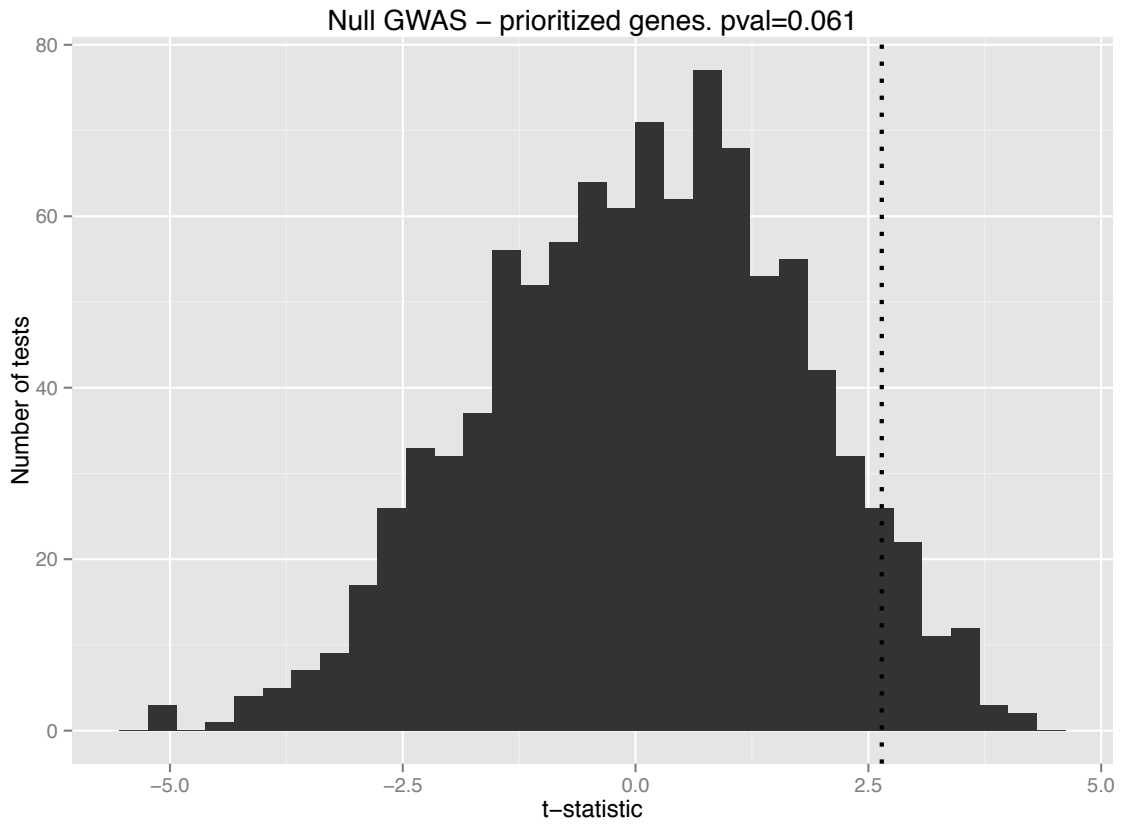

109  
110  
111  
112

113

114 **References**

- 115 1. Pers, T. H. *et al.* Biological interpretation of genome-wide association studies using  
116 predicted gene functions. *Nat. Commun.* **6**, 5890 (2015).
- 117 2. Saxena, R. *et al.* Genome-wide association analysis identifies loci for type 2 diabetes and  
118 triglyceride levels. *Science* **316**, 1331–6 (2007).
- 119 3. Ashburner, M. *et al.* Gene ontology: tool for the unification of biology. The Gene  
120 Ontology Consortium. *Nat. Genet.* **25**, 25–9 (2000).
- 121 4. Lage, K. *et al.* A human phenome-interactome network of protein complexes implicated in  
122 genetic disorders. *Nat. Biotechnol.* **25**, 309–16 (2007).
- 123 5. Kanehisa, M., Goto, S., Sato, Y., Furumichi, M. & Tanabe, M. KEGG for integration and  
124 interpretation of large-scale molecular data sets. *Nucleic Acids Res.* **40**, D109–14 (2012).
- 125 6. Croft, D. *et al.* Reactome: a database of reactions, pathways and biological processes.  
126 *Nucleic Acids Res.* **39**, D691–7 (2011).
- 127 7. Blake, J. A., Bult, C. J., Eppig, J. T., Kadin, J. A. & Richardson, J. E. The Mouse Genome  
128 Database: integration of and access to knowledge about the laboratory mouse. *Nucleic  
129 Acids Res.* **42**, D810–7 (2014).

130
